# Supplementary material
Source: publisher figshare collection journal article supplement (https://tandf.figshare.com/ndownloader/files/17292062)
Supplement: Supplementary file 1 [file 17292062]

**Supplementary Table S1**. Characteristics of febrile children 0-23 months old tested for UTI and treated at the SUMC, 2015 through 2016

| Variable | UTI  (cases)  *n* = 434 | Sterile culture  (controls)  *n* = 571 | *P* Value |
| --- | --- | --- | --- |
| Demographics |  |  |  |
| Age |  |  |  |
| Total age*;* mean ± SD | 6.9 ± 6.2 | 4.4 ± 5.1 | <.001 |
| 0-2 m, *n* (%) | 158 (36.4) | 342 (59.9) | <.001 |
| 3-5 m, *n* (%) | 81 (18.7) | 90 (15.8) | .236 |
| 6-23 m, *n* (%) | 195 (44.9) | 139 (24.3) | <.001 |
| Gender |  |  |  |
| Males, *n* (%)) | 136 (31.3) | 231 (40.4) | .003 |
| Females, *n* (%) | 298 (68.7) | 340 (59.6) | .003 |
| Risk factors history |  |  |  |
| Anatomical abnormality, *n* (%) | 19 (4.3) | 20 (3.5) | .512 |
| Clinical Parameters |  |  |  |
| Temperature; mean ± SD | 38.5 ± 1.0 | 38.3 ± 0.9 | .007 |
| Fever duration (days); mean ± SD | 2.6 ± 2.5 | 2.1 ± 1.8 | <.001 |
| Hospitalization, *n* (%) | 299 (68.9) | 410 (71.8) | .678 |
| Laboratory Features |  |  |  |
| Positive blood culture, *n* (%) | 25/409 (6.1) | 19/555 (3.4) | .060 |
| WBC (mm3); Mean ± SD | 16.5 ± 7.0 | 13.1 ± 5.9 | <.001 |
| WBC (mm3) ≥15k; (n, %) | 217/413 (52.5) | 180/555 (32.4) | <.001 |
| Neutrophil (mm3); Mean ± SD | 8.3 ± 5.4 | 5.4 ± 4 | <.001 |
| Neutrophil (mm3) ≥10k, N (%) | 118/414 (28.5) | 54/553 (9.8) | <.001 |
| Stab (mm3); Mean ± SD | 1.2 ± 1.2 | 0.9 ± 1.2 | .003 |
| Stab (mm3) ≥1.5k, N (%) | 47/159 (29.6) | 45/265 (17.0) | .003 |
| CRP (mg/L); Mean ± SD | 70.1 ± 69.6 | 30 ± 45.1 | <.001 |
| CRP ≥30, N (%) | 155/248 (62.5) | 98/355 (27.6) | <.001 |
| Clinical outcomes |  |  |  |
| Future UTI < 1 month, N (%) | 31 (7.1) | 10 (1.8) | <.001 |
| Future UTI < 1 year, N (%) | 58 (13.4) | 23 (4.0) | <.001 |
